# Supplementary material for: Influence of the degree of fluorination on the behaviour of silica particles at air–oil surfaces
Source: Royal Society of Chemistry journal article supplement (doi:10.1039/c2sm27395k), 2012-11-14

**Influence of the degree of fluorination on the behaviour of  
silica particles at air-oil surfaces**

Bernard P. Binks\* and Andrew T. Tyowua

*Surfactant & Colloid Group, Department of Chemistry,*

*University of Hull, Hull. HU6 7RX. U.K.*

Soft Matter:            Electronic Supplementary Information file

**Figure 1.** SEM images of (a) 75% SiOH fluorosilica and (b) 59% SiOH fluorosilica particles.

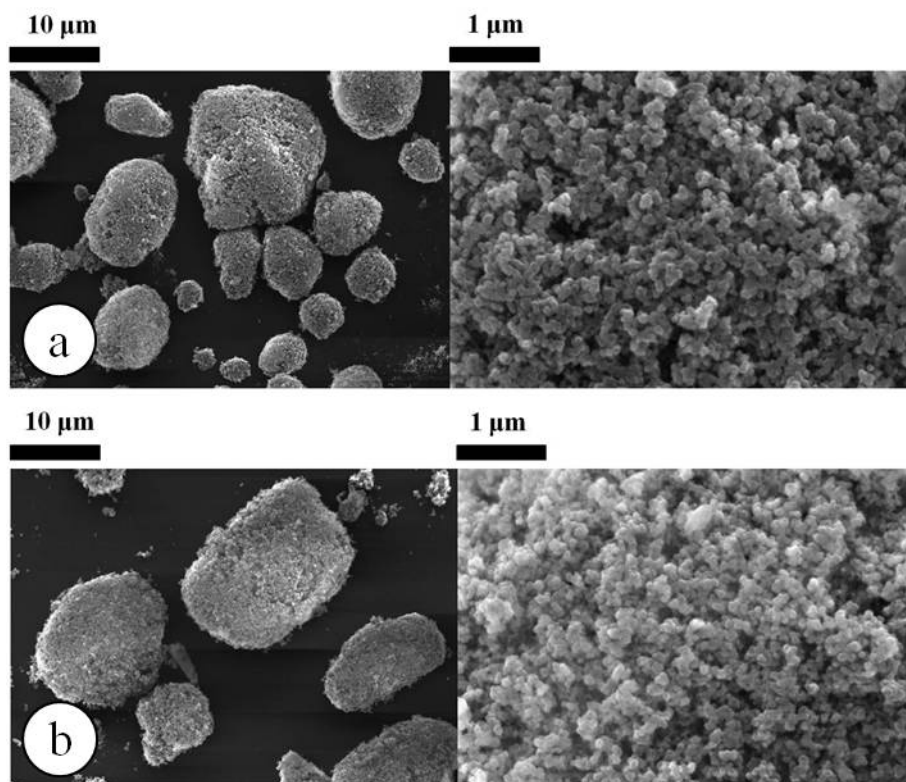

**Figure 2.** Photos of vessels containing fumed silica particles (50 mg) and liquid (3 cm<sup>3</sup>) mixtures after agitation.

A: hydrophilic 100% SiOH for (a) hexadecane, (b) perfluorohexane, (c) benzyl acetate, (d) diiodomethane and (e) glycerol.

B: fluorosilica 75% SiOH for (a) cyclohexane, (b) geraniol, (c) diiodomethane, (d) formamide and (e) water.

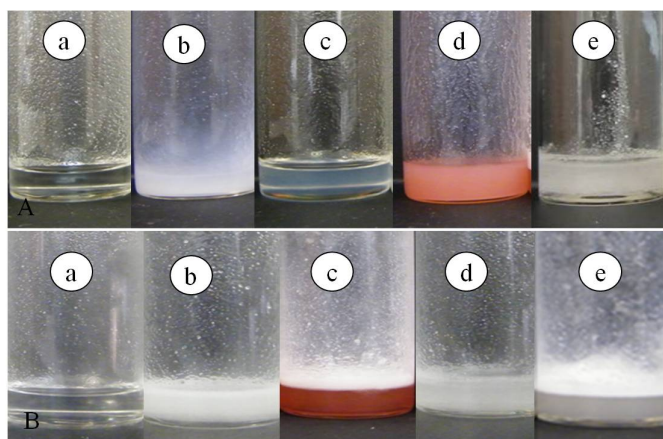

**Figure 3.** Photos of foams stabilised by various concentrations (given) of 59% SiOH fluorosilica particles 10 min. after preparation by hand shaking for (a) eugenol, (b)  $\alpha$ -bromonaphthalene and (c) ethylene glycol.

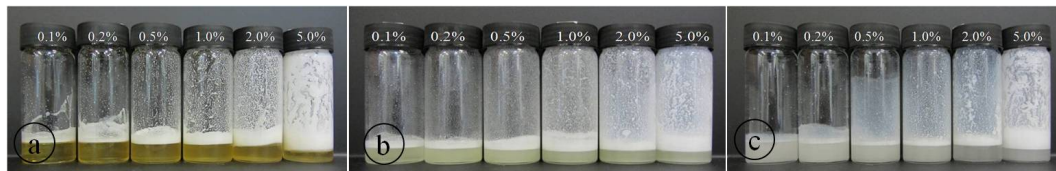

**Figure 4.** Optical microscopy images of some of the foams shown in ESI Figure 3 stabilised by 0.5 wt.% particles. (a)  $\alpha$ -bromonaphthalene and (b) ethylene glycol. Scale bar = 100  $\mu\text{m}$ .

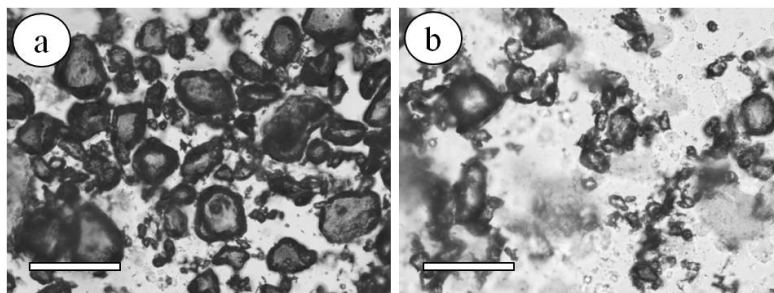

**Figure 5.** Foam volume *versus* time for foams stabilised by 2 wt.% of 59% SiOH fluorosilica particles made using a rotor-stator homogeniser (1 min.) with subsequent hand shaking (30 sec.).

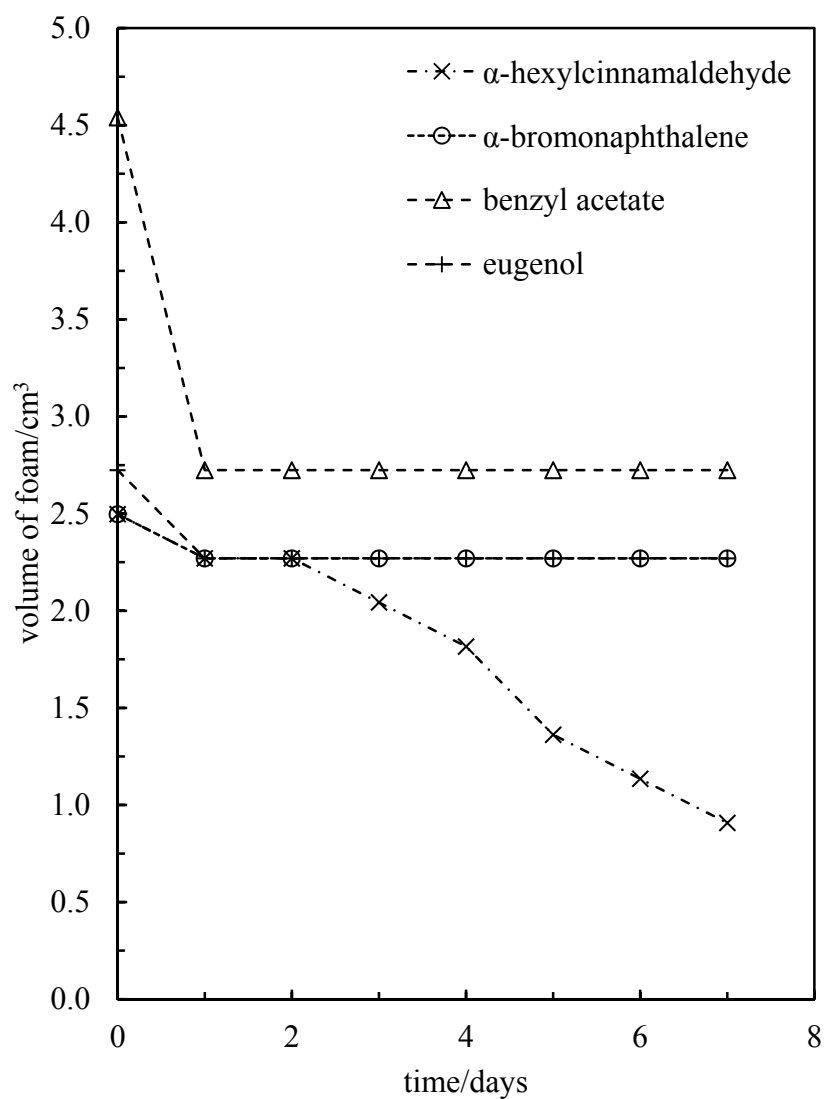

Supplement: c2sm27395k.pdf [file c2sm27395k.pdf]
